## Variation in DNA-ploidy Levels of *Reynoutria* Taxa in the Czech Republic

BOHUMIL MANDÁK<sup>1,\*</sup>, PETR PYŠEK<sup>1</sup>, MARTIN LYSÁK<sup>2</sup>, JAN SUDA<sup>1,3</sup>,  
ANNA KRAHULCOVÁ<sup>1</sup> and KATEŘINA BÍMOVÁ<sup>1,4</sup>

<sup>1</sup>Institute of Botany, Academy of Sciences of the Czech Republic, CZ-252 43 Průhonice, Czech Republic, <sup>2</sup>Laboratory of Molecular Cytogenetics and Cytometry, Institute of Experimental Botany, Sokolovská 6, CZ-772 00, Olomouc, Czech Republic, <sup>3</sup>Department of Botany, Charles University, Benátská 2, CZ-128 01, Prague, Czech Republic and <sup>4</sup>Institute of Applied Ecology, Czech Agricultural University Prague, CZ-281 63 Kostelec nad Černými lesy, Czech Republic

Received: 22 November 2002 Returned for revision: 12 March 2003 Accepted: 7 May 2003

The genus *Reynoutria* is represented by four taxa in the Czech Republic: *Reynoutria japonica* var. *japonica*, *R. japonica* var. *compacta*, *R. sachalinensis* and *R. ×bohemica*. By using flow cytometry, cytological variability within the genus is described based on 257 *Reynoutria* samples. The varieties of *R. japonica* are cytologically uniform, var. *japonica* is exclusively octoploid ( $2n = 8x = 88$ ) and var. *compacta* occurs only as a tetraploid ( $2n = 4x = 44$ ), but *R. sachalinensis* and *R. ×bohemica* exhibit some variation in chromosome numbers. *Reynoutria sachalinensis* is predominantly tetraploid ( $2n = 4x = 44$ ), but also occurs occasionally as hexaploid and octoploid cytotypes. The most common ploidy level in *R. ×bohemica* is hexaploid ( $2n = 6x = 66$ ), but tetraploid and octoploid clones were also found. The four taxa occurring in the Czech Republic are described briefly and the possible origins of the cytotypes discussed.

© 2003 Annals of Botany Company

**Key words:** Clonality, *Fallopia*, flow cytometry, hybridization, invasion, Polygonaceae, polyploidy, *Reynoutria japonica* var. *japonica*, *R. japonica* var. *compacta*, *R. sachalinensis*, *R. ×bohemica*.

### INTRODUCTION

The spread of an alien species and its ecological impact is sometimes positively correlated with the presence of polyploidy (Barrett, 1982; Thompson, 1991). Polyploidy in general allows the plant to diversify its genome due to genome reorganization (Soltis and Soltis, 1999) conferring adaptive plasticity (Roose and Gotlieb, 1976; Thompson and Lumaret, 1992) to hide deleterious alleles through an increase in frequency of heterozygous loci (Parsons, 1959), and subsequently to reduce the incidence of inbreeding. Polyploidy is frequently linked to vegetative reproduction (Gibby, 1981), which allows new taxa to buffer the disadvantages of small population size (Levin, 1975). Vegetative reproduction can help a plant of one sex to await the arrival of an individual of the opposite sex (Baker, 1986). Relatively high numbers of invasive plants possess diaspores adapted to asexual reproduction (Vogt Andersen, 1995), and some highly invasive plants, such as *Reynoutria japonica* var. *japonica*, are restricted exclusively to this method of reproduction in their adventive range (Hollingsworth *et al.*, 1998).

Hybridization of related invasive taxa in the territory of their secondary distribution is a relatively common event (Vilà *et al.*, 2000). Compared with their parents, the hybrids can possess various levels of fitness (Rieseberg, 1995). Examples of hybridization generating new taxa more highly invasive than their parents have been known (Vilà *et al.*, 2000). Fast evolution of new taxa by coincidence of

hybridization and polyploidization and subsequent spread of newly evolved species have been documented in *Senecio* (Abbott, 1992; Lowe and Abbott, 1996), *Tragopogon* (Roose and Gotlieb, 1976; Novak *et al.*, 1991), *Spartina* (Marchant, 1967, 1968; Ayres and Strong, 2001) and *Carpobrotus* (Vilà and D'Antonio, 1998).

In members of the genus *Reynoutria* the combination of hybridization, the presence of various ploidy levels and pronounced clonality are probably the main determinants of their successful spread in the countryside. The basic scheme occurring within the genus has been described for the British Isles (Bailey and Stace, 1992; Bailey, 1994; Bailey *et al.*, 1995; Hollingsworth *et al.*, 1998; Hollingsworth and Bailey, 2000*a, b*), but little information is available for other parts of Europe. To understand better the determinants of invasiveness within the genus, it is useful to know the degree of cytological variation within the Czech Republic. Hence, the main aim of this paper is to describe the number of cytotypes and discuss their possible origins.

### MATERIALS AND METHODS

#### *Study species*

Representatives of the genus *Reynoutria* Houtt. (syn. *Fallopia* Adans.) (Polygonaceae) are herbaceous perennials with robust erect stems, an extensive system of thick rhizomes, deeply three-parted styles with fimbriate stigmas, and a functionally dioecious breeding system. There are two distinct opinions on the classification at the generic level. Some authors treat the group as the distinct genus

\* For correspondence. E-mail mandak@ibot.cas.cz

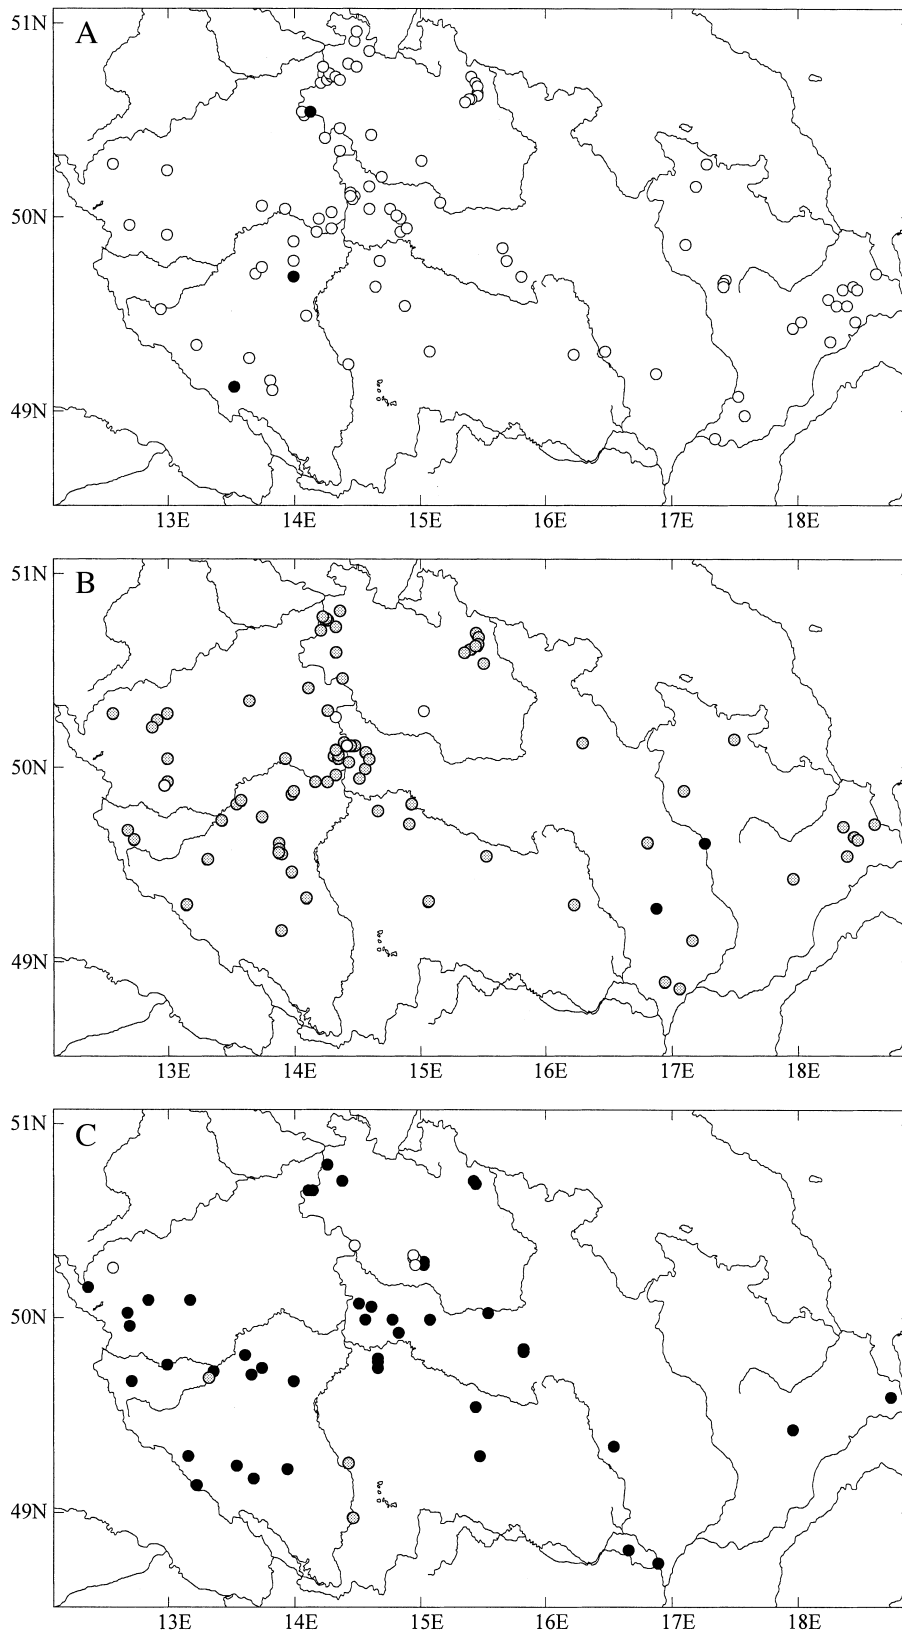

FIG. 1. Distribution of the 257 *Reynoutria* clones used in this study. A, *Reynoutria japonica* var. *japonica* (white circles) and *R. japonica* var. *compacta* (black circles). B, *R. ×bohemica*; C, *R. sachalinensis*. Black circles indicate tetraploids ( $2n = 44$ ), grey circles hexaploids ( $2n = 66$ ), and open circles octoploids ( $2n = 88$ ). For localities see Supplementary data: (<http://www.aob.oupjournals.org>).

*Reynoutria* (Holub, 1971), others as a section of the genus *Fallopia* [i.e. *Fallopia* sect. *Reynoutria* (Houtt.) Ronse Decr.] (Ronse Decraene and Akeroyd, 1988; Bailey and Stace, 1992). In this paper, we follow the former approach represented by the taxonomy of Holub (1971).

All species present in the Czech Republic were introduced into Europe as garden ornamentals from eastern Asia in the 19th century (Conolly, 1977; Bailey and Conolly, 2000). In the Czech Republic, the genus is represented by *R. japonica* Houtt. var. *japonica*, *R. japonica* Houtt. var. *compacta* Moldenke, *R. sachalinensis* (F. Schmidt) Nakai and the hybrid between *R. sachalinensis* and *R. japonica*, namely *R. ×bohemica* Chrtek et Chrtková described from the Czech Republic by Chrtek and Chrtková (1983). All invade riparian and various human-made habitats and often spread into semi-natural vegetation (Brabec and Pyšek, 2000; Pyšek *et al.*, 2001). The spread of *Reynoutria* taxa in the Czech Republic is mainly vegetative through regeneration from rhizome and stem segments (Mandák and Pyšek, 1996; Bímová *et al.*, 2001, 2003) resulting from the unusual form of sexual reproduction where members of the genus *Reynoutria* have been reported to sexually reproduce only rarely within the adventive distribution area due to inefficient seedling establishment (Bailey *et al.*, 1995).

In *R. sachalinensis*, hermaphrodite and female tetraploid ( $2n = 4x = 44$ ) clones have been recorded in Europe (Bailey and Stace, 1992). All European plants of *R. japonica* var. *japonica* recorded to date have been octoploid ( $2n = 8x = 88$ ) and those of *R. japonica* var. *compacta* exclusively tetraploid ( $2n = 4x = 44$ ) (Bailey and Stace, 1992). As yet, only female clones of *R. japonica* var. *japonica* have been recorded in the Czech Republic. However, despite the absence of pollen, the plants produce seeds because they are fertilized by pollen from *Fallopia aubertii* (L. Henry) Holub to give either *Fallopia ×conollyana* J. P. Bailey (Bailey, 2001) or *R. sachalinensis* (Mandák and Pyšek, 1996). In the latter case, the hybrid *Reynoutria ×bohemica* is produced ( $2n = 6x = 66$ ) (Bailey and Stace, 1992).

#### Material collection

In total, 257 *Reynoutria* plants were collected from the wild in the Czech Republic between 1998 and 2001. Sampling locations were chosen such that they were representative of the whole of the Czech Republic and to obtain a sound basis for sampling the cytological variability [Fig. 1 and see Supplementary data (<http://www.aob.oupjournals.org>) for list of localities]. Samples were transplanted to the experimental garden of the Institute of Botany in Průhonice, Czech Republic. Rhizomes were planted in 12 l plastic pots filled with garden soil, and regenerated plants were used to ascertain chromosome numbers.

#### Chromosome counts

A modified method of Bailey and Stace (1992) was used to prepare slides for chromosome counting. Actively growing roots were pretreated in 0.002 M 8-hydroxyquinoline for 22–24 h at 4 °C, fixed overnight in 3 : 1 ethanol : acetic acid and stored at 4 °C in 70 % ethanol

until used. Root-tips were hydrolysed in 2N HCl for 10 min at 60 °C, rinsed in water and the meristematic tissue excised and squashed in a drop of lacto-propionic orcein (Dyer, 1963). Chromosomes were counted using a phase-contrast microscope.

#### Ploidy level estimation

All 257 clones were subjected to flow cytometric analysis of nuclear DNA content. A two-step procedure of sample preparation was employed (Otto, 1990). Approximately 2 cm<sup>2</sup> of fresh young leaf tissue of an analysed plant, together with approx. 1 cm<sup>2</sup> of leaf tissue of an internal standard with known chromosome number [*R. sachalinensis*  $2n = 4x = 44$ , *R. ×bohemica*  $2n = 6x = 66$  or *R. japonica*  $2n = 8x = 88$  (Supplementary data: <http://www.aob.oupjournals.org>)] were chopped with a new razor blade in a Petri dish containing 1 ml ice-cold Otto I buffer (0.1 M citric acid, 0.5 % Tween 20). The sample was filtered through a nylon mesh (42 µm) and centrifuged at 150g for 5 min. The supernatant was removed and the nuclei resuspended in 100 µl of ice-cold Otto I buffer. After 30 min incubation at room temperature, 1 ml of Otto II buffer (0.4 M Na<sub>2</sub>HPO<sub>4</sub>·12H<sub>2</sub>O) with DAPI at a final concentration of 4 µg ml<sup>-1</sup> was added. Samples were stained for 30 min at room temperature. The relative fluorescence of isolated nuclei was analysed using a Partec PA II flow cytometer (Partec GmbH, Münster, Germany). The cytometer was adjusted so that the fluorescence of G<sub>1</sub> nuclei of tetraploid plants (internal standard) was localized on channel 200.

## RESULTS

The most common taxon, *R. japonica* var. *japonica*, was represented by 99 samples, *R. ×bohemica* by 94 samples, *R. sachalinensis* by 61 samples and *R. japonica* var. *compacta* was found only in three localities [Fig. 1 and Supplementary data (<http://www.aob.oupjournals.org>)].

The analysis of DNA content of nuclei isolated from leaf tissue showed that most of the nuclei were in the G<sub>0</sub>/G<sub>1</sub> phase of the cell cycle and thus formed a dominant peak in histograms of DNA content. This peak was localized at channel 205 for tetraploid plants (CV = 2.23), at channel 335 for hexaploid plants (CV = 1.71) and at channel 461 for octoploid plants (CV = 1.31). The peak ratios were 1 : 1.63 : 2.25 for *R. sachalinensis*, *R. ×bohemica* and *R. japonica*, respectively (Fig. 2).

Both varieties of *R. japonica* were cytologically uniform; all *R. j.* var. *japonica* plants were octoploid, and all those of *R. j.* var. *compacta* tetraploid (Fig. 3). *Reynoutria sachalinensis* was predominantly tetraploid. Their hybrid, *R. ×bohemica*, was hexaploid. In addition, ploidy levels deviating from the above pattern were found in *R. ×bohemica* and *R. sachalinensis* (Fig. 3). Their most likely origins are shown in Fig. 4.

The distribution of particular taxa and ploidy levels in the area studied is shown in Fig. 1. *Reynoutria* taxa occur more frequently in human-made and riparian habitats regardless of ploidy level of particular taxa in the Czech Republic

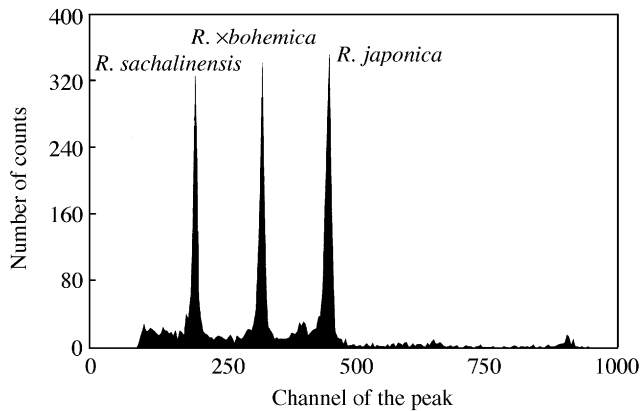

FIG. 2. Histogram of relative nuclear DNA content of particular *Reynoutria* species. The  $G_0/G_1$  peak of tetraploid *R. sachalinensis* was on channel 205, that of hexaploid *R. xbohemica* on channel 335 and that of octoploid *R. japonica* var. *japonica* on channel 461, i.e. the peak ratios are 1 : 1.63 : 2.25 for *R. sachalinensis*, *R. xbohemica* and *R. japonica*, respectively.

(Fig. 5). The occurrence of octoploid *R. sachalinensis* and *R. xbohemica* is restricted to several localities that closely correspond to the presence of parks or old gardens. However, there is no general geographical pattern, and particular localities of different taxa and ploidy levels are often far from each other (Fig. 1).

## DISCUSSION

Polyploidy is a common phenomenon in plants; it is estimated to occur in 47–70 % of angiosperm species (Ramsey and Schemske, 1998). Being of great importance for plant taxonomy, evolution and ecology, it is thus of interest to plant biologists. Formation of polyploid series of morphologically and ecologically different, but closely related, species allows us to understand the importance of polyploidy in nature using methods of comparative ecology.

Cytological variation of *R. japonica* var. *japonica* in its native regions is high and includes tetraploids, hexaploids, octoploids and decaploids (Table 1). This is in contrast to the situation in the adventive distribution area covered by the reported study where only octoploids were found. The frequency distribution of ploidy levels ascertained in *R. japonica* var. *japonica* does not differ from that reported from other European countries (Table 1), with the exception of Slovakia. However, the results of the reported study and of chromosome counts made by Bailey and Stace (1992) who only found octoploid plants in Europe, question the tetraploid chromosome numbers reported from Slovakia (Májovský *et al.*, 1987), which are probably due to misidentification of the taxa. *Reynoutria japonica* var. *japonica* is exclusively octoploid in Europe and does not possess any variation at either cytological or genotype level (Bailey and Stace, 1992; Hollingsworth and Bailey, 2000a). The present distribution probably resulted from a single introduction to Europe in the 19th century (Bailey and Conolly, 2000).

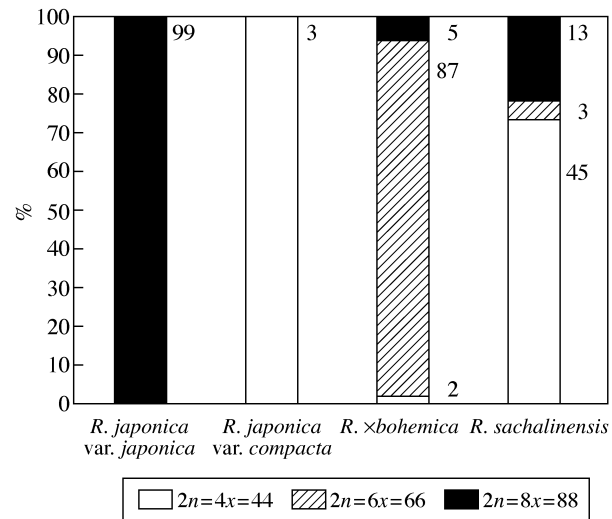

FIG. 3. Ploidy levels in particular *Reynoutria* taxa. Numbers indicate the number of samples analysed.

The dwarf alpine form *R. japonica* var. *compacta* has been repeatedly reported to be tetraploid (Table 1) which is in accordance with our study. Nevertheless, chromosome counts published to date are only from the adventive distribution area where *R. japonica* var. *compacta* is distinguished as a morphologically distinct type. This distinction certainly results from the bottleneck effect; in the native distribution area, there is a high morphological variability creating a continuum between *R. japonica* var. *japonica* and *R. japonica* var. *compacta* (Shiosaka and Shibata, 1993). For this reason, most authors working in the Far East do not recognize this variety (Lee, 1972; Kim and Park, 2000; but see Ohwi, 1965). On the other hand, Yonekura and Ohashi (1997) recognized, in addition to var. *japonica*, two more varieties of *R. japonica*, namely var. *hachidoensis* (Honda) Yonekura et H. Ohashi and var. *uzenesis* (Honda) Yonekura et H. Ohashi. Both are endemic to Japan and have never been introduced into Europe.

Whereas *R. japonica* is cytologically uniform in Europe (Table 1), the situation with *R. sachalinensis* and *R. xbohemica* is much more complicated. Our study yielded new ploidy levels (Figs 3 and 4). *Reynoutria sachalinensis* is predominantly tetraploid, but we also found hexaploids and octoploids (Fig. 3). There are two possible methods by which this could arise: (1) by generative reproduction via unreduced gametes or (2) by somatic mutations (i.e. autopolyploidization leading to an octoploid cytotype). The former method is limited by rarely occurring sexual reproduction in *Reynoutria* taxa in the territory studied. Hence, occasional generative reproduction fixed by clonality over time could store ‘aberrant’ ploidy levels for a long time. Massive clonal growth could function in the same way in the case of somatic mutation without the necessity for generative reproduction. However, since the frequency of somatic mutations in *R. sachalinensis* is not known, the latter explanation of ‘aberrant’ ploidy levels only remains a speculation. An alternative explanation is the introduction

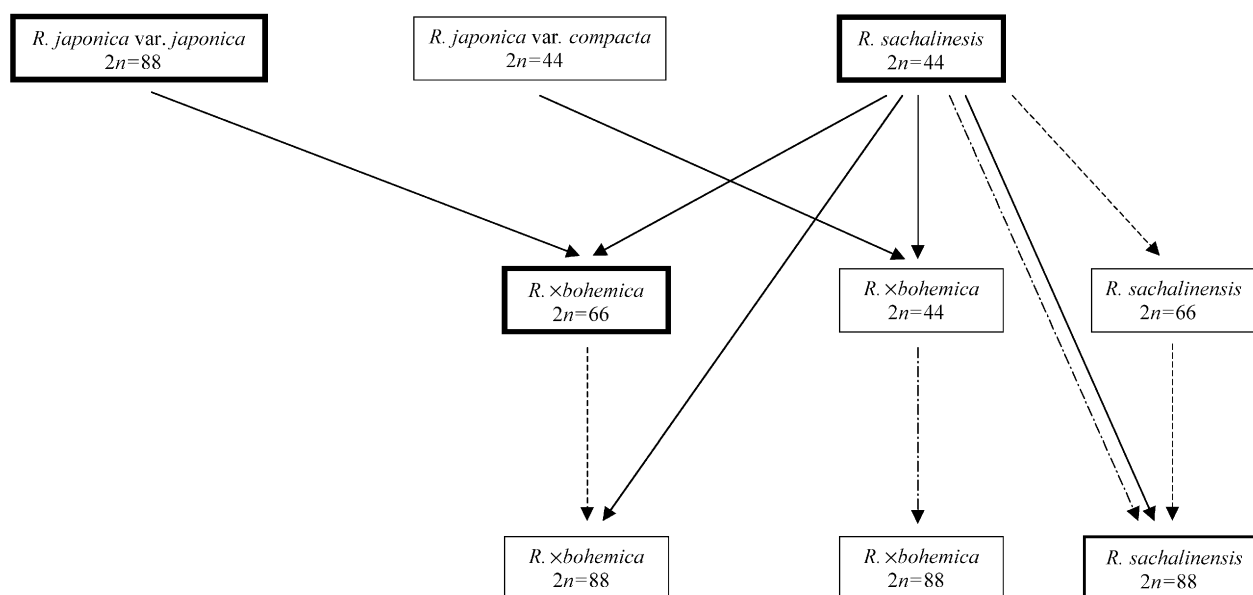

FIG. 4. Schema of hybridization and polyploidization within the genus *Reynoutria* in the Czech Republic. More frequent ploidy levels are indicated by wider frames: those with 6–20 localities have intermediate frames, those with more than 20 localities have wide frames. Solid lines indicate origin of particular taxa by hybridization, dashed lines indicate expected fusion of reduced and unreduced gametes, and dot-and-dashed lines indicate autopolyploidization.

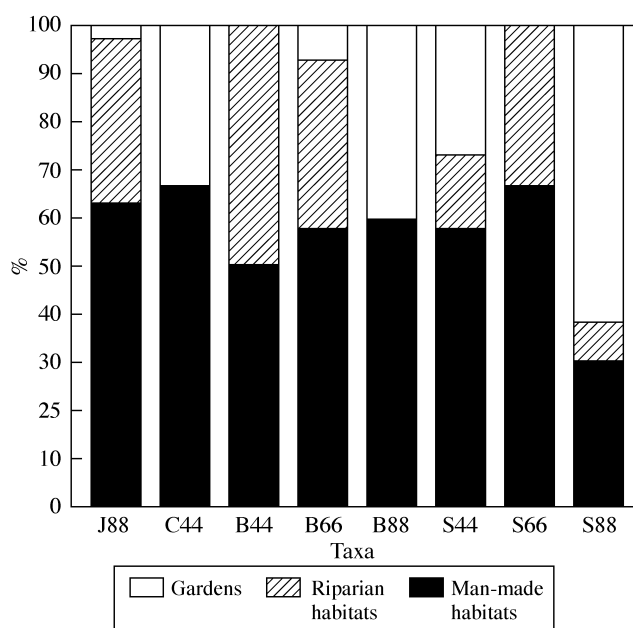

FIG. 5. Contribution of particular habitat types to the total number of localities for particular taxa and ploidy levels. J88, *Reynoutria japonica* var. *japonica* ( $2n = 88$ ); C44, *R. japonica* var. *compacta* ( $2n = 44$ ); B44, *R. xbohemica* ( $2n = 44$ ); B66, *R. xbohemica* ( $2n = 66$ ); B88, *R. xbohemica* ( $2n = 88$ ); S44, *R. sachalinensis* ( $2n = 44$ ); S66, *R. sachalinensis* ( $2n = 66$ ); S88, *R. sachalinensis* ( $2n = 88$ ).

of these ‘aberrant’ ploidy levels directly from the native distribution areas, Japan, Sakhalin or Ullung-do (an island between Japan and Korea). The ability of hexaploid and

octoploid *R. sachalinensis* to hybridize with other *Reynoutria* taxa has never been studied, i.e. there are no data concerning the fertility of pollen grains, seed viability or the ability of seedlings to survive. On the other hand, hybridization between and within particular *Reynoutria* taxa is common (Bailey and Stace, 1992). Hence, we can expect further hybridization with other *Reynoutria* taxa and the subsequent rise of new hybrid combinations with unknown properties.

*Reynoutria xbohemica* is a hybridogenous taxon that either originated in the adventive distribution area or was directly introduced from the native distribution area. Hybridization events of alien plants followed by the spread of the hybrid have been documented (Vilà *et al.*, 2000). Such events can lead to the rapid evolution of new taxa and expansion of their range. Eventually, such hybrid taxa may interfere with human objectives and become weedy or invasive (Abbott, 1992) as is the case with *R. xbohemica* (B. Mandák and P. Pyšek, unpubl. res.).

However, the pattern of cytological variation in *R. xbohemica* follows that found in *R. sachalinensis* but with different underlying mechanisms (Bailey *et al.*, 1995). *Reynoutria xbohemica* is predominantly hexaploid (Fig. 3). The clones with different ploidy levels, i.e. tetraploids and octoploids, have different origins. The tetraploid *R. xbohemica* is probably a hybrid between *R. sachalinensis* and *R. japonica* var. *compacta* (Fig. 4). Bailey and Stace (1992) pointed out that this hybrid is very difficult to distinguish on morphological grounds from hexaploid *R. xbohemica*, and chromosome numbers are often the only means of identifying these clones. The origin of octoploid *R. xbohemica* plants is inevitably more specula-

TABLE 1. Literature records of chromosome numbers found in *Reynoutria japonica* var. *japonica*, *R. japonica* var. *compacta*, *R. sachalinensis* and *R. ×bohemica* in both native and adventive territories

| Reference                                                                                               | Chromosome number (2n) | Locality                                     |
|---------------------------------------------------------------------------------------------------------|------------------------|----------------------------------------------|
| <i>Reynoutria japonica</i> Houtt. var. <i>japonica</i>                                                  |                        |                                              |
| Native distribution area                                                                                |                        |                                              |
| Bailey (1999)                                                                                           | 88                     | Korea                                        |
| Bailey (2003)                                                                                           | 44, 88                 | Japan                                        |
| Bailey (1999), Hollingsworth and Bailey (2000b)                                                         | 88, 110                | China                                        |
| Sugiura (1931), Doida (1960), Bailey (1999), Hollingsworth and Bailey (2000b)                           | 44                     | Japan                                        |
| Kim and Park (2000)                                                                                     | 44, 66, 88             | Korea                                        |
| Lee (1972)                                                                                              | 88                     | Korea                                        |
| Adventive distribution area                                                                             |                        |                                              |
| Bailey (2003)                                                                                           | 88                     | Hungary, USA, Canada, Australia, New Zealand |
| Bailey and Stace (1992)                                                                                 | 88                     | Great Britain                                |
| Graham and Wood (1965)                                                                                  | 44, approx. 88         | USA                                          |
| Hollingsworth and Bailey (2000b)                                                                        | 88                     | Great Britain                                |
| Májovský <i>et al.</i> (1974), Murín (1974), Váchová and Feráková (1986), Májovský <i>et al.</i> (1987) | 44                     | Slovakia                                     |
| Mandák <i>et al.</i> , this study                                                                       | 88                     | Czech Republic                               |
| Wcisło (1977), Pogan and Wcisło (1983)                                                                  | 88                     | Poland                                       |
| Zhukova [1967, in Bolkhovskikh <i>et al.</i> (1969)]                                                    | approx. 60             | Russia                                       |
| <i>Reynoutria japonica</i> Houtt. var. <i>compacta</i> Moldenke                                         |                        |                                              |
| Native distribution area                                                                                |                        |                                              |
| Bailey (2003)                                                                                           | 44                     | Japan                                        |
| Adventive distribution area                                                                             |                        |                                              |
| Bailey and Conolly (1985), Bailey and Stace (1992), Hollingsworth and Bailey (2000b), Bailey (2003)     | 44                     | Great Britain                                |
| Bailey (2003), Mandák <i>et al.</i> , this study                                                        | 44                     | Czech Republic                               |
| <i>Reynoutria sachalinensis</i> (F. Schmidt) Nakai                                                      |                        |                                              |
| Native distribution area                                                                                |                        |                                              |
| Bailey (2003)                                                                                           | 102, 103               | Korea                                        |
| Bailey and Stace (1992), Bailey (2003)                                                                  | 44                     | Japan                                        |
| Kim and Park (2000)                                                                                     | 132                    | Korea                                        |
| Kim and Park (2000)                                                                                     | 44                     | Japan                                        |
| Lee (1972)                                                                                              | 102                    | Korea                                        |
| Sokolovskaya [1960, 1965 in Bolkhovskikh <i>et al.</i> (1969)]                                          | 44                     | Russia (Sakhalin)                            |
| Adventive distribution area                                                                             |                        |                                              |
| Bailey (2003)                                                                                           | 44, 66                 | USA                                          |
| Bailey and Stace (1992)                                                                                 | 44                     | Great Britain                                |
| Májovský and Váchová (1986), Májovský <i>et al.</i> (1987)                                              | 44                     | Slovakia                                     |
| Mandák <i>et al.</i> , this study                                                                       | 44, 66, 88             | Czech Republic                               |
| Menshikova [1964, in Bolkhovskikh <i>et al.</i> (1969)]                                                 | ca. 66                 | Russia                                       |
| Wcisło (1977), Pogan and Wcisło (1983)                                                                  | 44                     | Poland                                       |
| <i>Reynoutria × bohemica</i> Chrték et Chrtková                                                         |                        |                                              |
| Native distribution area                                                                                |                        |                                              |
| Bailey (2003)                                                                                           | 66                     | Japan                                        |
| Adventive distribution area                                                                             |                        |                                              |
| Bailey and Stace (1992), Bailey <i>et al.</i> (1996), Bailey (2003)                                     | 44, 66, 88             | Great Britain                                |
| Bailey (2003)                                                                                           | 88                     | France, Germany                              |
| Bailey (2003)                                                                                           | 66                     | USA, Australia, New Zealand                  |
| Mandák <i>et al.</i> , this study                                                                       | 44, 66, 88             | Czech Republic                               |

tive (Bailey, 1999). They are probably the product of fusion of an unreduced (hexaploid plant of *R. ×bohemica*) and a reduced (tetraploid plant of *R. sachalinensis*) gamete. Another possibility is autopolyploidization of the tetraploid *R. ×bohemica* cytotype (Fig. 4).

Bailey and Stace (1992) showed that hexaploid *R. ×bohemica* has extremely irregular meiosis, with large numbers of univalents and multivalents up to quadrivalents.

This fact is reflected in low pollen fertility. In contrast, both tetraploid and octoploid *R. ×bohemica* have much more regular meiosis than the hexaploid. This agrees with our finding that the pollen grains of hexaploid *R. ×bohemica* showed lower germination than the octoploid clones (Koukolíková 2001). We can partly confirm this result that regularity of meiosis in *Reynoutria* hybrids is determined mainly by the ploidy level of these taxa.

The most common ploidy levels of particular *Reynoutria* taxa are scattered over the whole of the Czech Republic (Fig. 1). Most of the habitats occupied by *Reynoutria* taxa are in human settlements and the occurrence of the taxa is therefore associated with cultivation and subsequent accidental spreading by man, water or soil movements connected with building activities. Compared with the other *Reynoutria* taxa, the presence of octoploid *R. ×bohemica* and *R. sachalinensis* is more associated with gardens (Fig. 5). Hence, there is a possibility that these 'aberrant' ploidy levels were introduced directly from native distribution areas or evolved in gardens and then spread locally.

Although a direct genotype analysis is needed to confirm this conclusion, the high cytological variability of *R. ×bohemica* indicates that the evolution of new taxa is in progress within the complex studied. This fact, in combination with a high invasive potential within the group, is alarming. Selection of new, more invasive clones at the cytological level brings about the possibility that new cytotypes with a greater ability to spread and survive could emerge in central Europe.

#### SUPPLEMENTARY INFORMATION

Supplementary data contain a list of *Reynoutria* localities with ploidy levels and geographical coordinates in the Czech Republic.

#### ACKNOWLEDGEMENTS

We thank Ivan Ostrý, Irena Koukolíková and Jan Pergl for technical assistance. We are also grateful to John P. Bailey for his help with various *Reynoutria* problems and for reading the manuscript. The work was supported by grant no. A6005805/1998 from the Grant Agency of the Academy of Sciences of the Czech Republic, and grant no. AV0Z6005908 from the Academy of Sciences of the Czech Republic.

#### LITERATURE CITED

- Abbott RJ. 1992.** Plant invasions, interspecific hybridization and the evolution of new plant taxa. *Trends in Ecology and Evolution* **7**: 401–405.
- Ayres DR, Strong DR. 2001.** Origin and genetic diversity of *Spartina anglica* (Poaceae) using nuclear DNA markers. *American Journal of Botany* **88**: 1863–1867.
- Bailey JP. 1994.** The reproductive biology and fertility of *Fallopia japonica* (Japanese Knotweed) and its hybrids in the British Isles. In: de Waal C, Child LE, Wade M, Brock JH, eds. *Ecology and management of invasive riparian plants*. Chichester: John Wiley and Sons, 141–158.
- Bailey JP. 1999.** The Japanese Knotweed invasion of Europe: the potential for further evolution in non-native regions. In: Yano E, Matsuo K, Shiyomi M, Andow DA, eds. *Biological invasions of ecosystems by pests and beneficial organisms*. Tsukuba: NIAES, Series 3, 27–37.
- Bailey JP. 2001.** *Fallopia × conollyana* the Railway-yard Knotweed. *Watsonia* **23**: 539–541.
- Bailey JP. 2003.** Japanese Knotweed s.l. at home and abroad. In: Child LE, Brock JH, Brundu G, Prach K, Pyšek P, Williamson M, eds. *Ecology and management of plant invasions*. Leiden: Backhuys Publisher (in press).
- Bailey JP, Conolly AP. 1985.** Chromosome numbers of some alien *Reynoutria* species in the British Isles. *Watsonia* **15**: 270–271.
- Bailey JP, Conolly AP. 2000.** Prize-winners to pariahs – a history of Japanese Knotweed s.l. (Polygonaceae) in the British Isles. *Watsonia* **23**: 93–110.
- Bailey JP, Stace CA. 1992.** Chromosome number, morphology, pairing, and DNA values of species and hybrids in the genus *Fallopia* (Polygonaceae). *Plant Systematics and Evolution* **180**: 29–52.
- Bailey JP, Child LE, Wade M. 1995.** Assessment of the genetics variation of British populations of *Fallopia japonica* and its hybrid *Fallopia ×bohemica*. In: Pyšek P, Prach K, Rejmánek M, Wade M, eds. *Plant invasions – general aspects and special problems*. Amsterdam: SPB Academic Publishing, 141–150.
- Bailey JP, Child LE, Conolly AP. 1996.** A survey of distribution of *Fallopia ×bohemica* (Chrtek et Chrtková) J. Bailey (Polygonaceae) in the British Isles. *Watsonia* **21**: 187–198.
- Baker HG. 1986.** Patterns of plant invasions in North America. In: Mooney HA, Drake JA, eds. *Ecology of biological invasions of North America and Hawaii*. New York: Springer Verlag, 44–57.
- Barrett SCH. 1982.** Genetic variation in weeds. In: Charudattan R, Wlajker H eds. *Biological control of weeds with plant pathogens*. New York: J. Wiley, 73–98.
- Bímová K, Mandák B, Pyšek P. 2001.** Experimental control of *Reynoutria* congeners: a comparative study of a hybrid and its parents In: Brundu G, Brock J, Camarda I, Child L, Wade M, eds. *Plant invasions: species ecology and ecosystem management*. Leiden: Backhuys Publishers, 283–290.
- Bímová K, Mandák B, Pyšek P. 2003.** Vegetative regeneration in invasive *Reynoutria* (Polygonaceae): a comparative experimental study of four congeners. *Plant Ecology* **166**: 1–11.
- Bolkhovskikh Z, Grif V, Matveyeva T, Zakharyeva O. 1969.** *Khromosomnye chisla tsvetkovykh rasteniy*. Leningrad: Academiae Scientiarum SSSR.
- Brabec J, Pyšek P. 2000.** Establishment and survival of three invasive taxa of the genus *Reynoutria* (Polygonaceae) in mesic mown meadows: a field experimental study. *Folia Geobotanica* **35**: 27–42.
- Chrtek J, Chrtková A. 1983.** *Reynoutria × bohemica*, nový kříženec z čeledi rdesnovitých. *Časopis Národního Muzea Praha, řada přírodovědná* **152**: 120.
- Conolly AP. 1977.** The distribution and history on the British Isles of some alien species of *Polygonum* and *Reynoutria*. *Watsonia* **11**: 291–311.
- Doida Y. 1960.** Cytological studies in *Polygonum* and related genera I. *Botanical Magazine* (Tokyo) **73**: 337–340.
- Dyer AF. 1963.** The use of lacto-propionic orcein in rapid squash methods for chromosome preparations. *Stain Technology* **38**: 85–90.
- Gibby M. 1981.** Polyploidy and its evolutionary significance. In: Forey PL ed. *The evolving biosphere*. Cambridge: British Museum (Natural History) and Cambridge University Press, 87–96.
- Graham SA, Wood CE. 1965.** The genera of Polygonaceae in the Southeastern United States. *Journal of the Arnold Arboretum* **46**: 91–121.
- Hollingsworth ML, Bailey JP. 2000a.** Evidence for massive clonal growth in the invasive *Fallopia japonica* (Japanese Knotweed). *Botanical Journal of the Linnean Society* **133**: 463–472.
- Hollingsworth ML, Bailey JP. 2000b.** Hybridisation and clonal diversity in some introduced *Fallopia* species (Polygonaceae). *Watsonia* **23**: 111–121.
- Hollingsworth ML, Hollingsworth PM, Jenkins GI, Bailey JP. 1998.** The use of molecular markers to study patterns of genotypic diversity in some invasive alien *Fallopia* ssp. (Polygonaceae). *Molecular Ecology* **7**: 1681–1691.
- Holub J. 1971.** *Fallopia* Adans. 1763 instead of *Bilderdykia* Dum. 1827. *Folia Geobotanica & Phytotaxonomica* **6**: 171–177.
- Kim JY, Park C-W. 2000.** Morphological and chromosomal variation in *Fallopia* section *Reynoutria* (Polygonaceae) in Korea. *Brittonia* **52**: 34–48.
- Koukolíková I. 2001.** Floral biology of selected *Reynoutria* and *Fallopia* taxa. MSc Thesis, Czech University of Agriculture, Prague. (In Czech).
- Lee YN. 1972.** Chromosome number of flowering plants in Korea (4). *Journal of the Korean Research Institute for Better Living* **8**: 41–51.
- Levin DA. 1975.** Minority cytotype exclusion in local plant populations. *Taxon* **24**: 35–43.
- Lowe AJ, Abbott RJ. 1996.** Origins of the new allopolyploid species

- Senecio cambrensis* (Asteraceae) and its relationships to the Canary Island endemic *Senecio teneriffae*. *American Journal of Botany* **83**: 1365–1372.
- Májovský J. 1974.** Index of chromosome numbers of Slovakian flora (part 3). *Acta Facultatis Rerum Naturalium Universitas Comeniana, Botanica* **22**: 1–20.
- Májovský J, Murín A, Fenàkova V, Hindàková M, Schwarzová T, Uhríková A, Váchová M, Záborský J. 1987.** *Karyotaxonomický prehľad flóry Slovenska*. Bratislava: Veda.
- Májovský J, Váchová M. 1986.** Karyological study of the Slovak flora XIII. *Acta Facultatis Rerum Naturalium Universitatis Comeniana, Botanica* **33**: 63–67.
- Mandák B, Pyšek P. 1996.** Species of the genus *Reynoutria* in the Czech Republic. *Zprávy Čes. Bot. Společ.*, Praha, 32, Mater. **14**: 45–57. (In Czech).
- Marchant CJ. 1967.** Evolution in *Spartina* (Graminae). 1. The history and morphology of the genus in Britain. *Botanical Journal of the Linnean Society* **60**: 1–24.
- Marchant CJ. 1968.** Evolution in *Spartina* (Graminae). 2. Chromosomes, basic relationships and the problem of *S. × townsendii* agg. *Botanical Journal of the Linnean Society* **60**: 381–409.
- Murín A. 1974.** Index of chromosome numbers of Slovakian flora (part 4). *Acta Facultatis Rerum Naturalium Universitas Comeniana, Botanica* **23**: 1–23.
- Novak SJ, Soltis DE, Soltis PS. 1991.** Ownbey's *Tragopogons*: 40 years later. *American Journal of Botany* **78**: 1586–1600.
- Ohwi J. 1965.** *Flora of Japan*. Washington DC: Smithsonian Institution.
- Otto F. 1990.** DAPI staining of fixed cells for high-resolution flow cytometry of nuclear DNA. In: Crissman HA, Darzynkiewicz Z, eds. *Methods in cell biology*, Vol. 33. New York: Academic Press, 105–110.
- Parsons PA. 1959.** Some problems in inbreeding and random mating in tetrasomics. *Agronomy Journal* **51**: 465–467.
- Pogan E, Wcisło H. 1983.** A list of chromosome numbers of Polish Angiosperms. II. *Acta Biologica Cracoviensia Series Botanica* **25**: 103–172.
- Pyšek P, Mandák B, Francírková T, Prach K. 2001.** Persistence of stout clonal herbs as invaders in the landscape: a field test of historical records. In: Brundu G, Brock J, Camarda I, Child L, Wade M, eds. *Plant invasions: Species ecology and ecosystem management*. Leiden: Backhuys Publishers, 235–244.
- Ramsey J, Schemske DW. 1998.** Pathways, mechanisms, and rates of polyploid formation in flowering plants. *Annual Review of Ecology and Systematics* **29**: 467–501.
- Rieseberg LH. 1995.** The role of hybridisation in evolution: old wine in new skin. *American Journal of Botany* **82**: 944–953.
- Ronse Decraene L-P, Akeroyd JR. 1988.** Generic limits in *Polygonum* and related genera (Polygonaceae) on the basis of floral characters. *Botanical Society of the Linnean Society* **98**: 321–371.
- Roose ML, Gottlieb LD. 1976.** Genetic and biochemical consequences of polyploidy in *Tragopogon*. *Evolution* **30**: 818–830.
- Shiosaka H, Shibata O. 1993.** Morphological changes in *Polygonum cuspidatum* Sieb. et Zucc. reciprocally transplanted among different altitudes. *Japanese Journal of Ecology* **43**: 31–37.
- Soltis DE, Soltis PS. 1999.** Polyploidy: recurrent formation and genome evolution. *Trends in Ecology and Evolution* **14**: 348–352.
- Sugiura T. 1931.** A list of chromosome numbers in angiospermous plants. *Botanical Magazine (Tokyo)* **45**: 353–355.
- Thompson JD. 1991.** The biology of an invasive plant. What makes *Spartina anglica* so successful? *BioScience* **41**: 393–401.
- Thompson JL, Lumaret R. 1992.** The evolutionary dynamics of polyploid plants: origins, establishment and persistence. *Trends in Ecology and Evolution* **7**: 302–306.
- Váchová M, Feráková V. 1986.** Karyological study of the Slovak flora XXI. *Acta Facultatis Rerum Naturalium Universitas Comeniana, Botanica* **33**: 57–62.
- Vilà M, D'Antonio CM. 1998.** Fruit choice and seed dispersal of invasive vs. noninvasive *Carpobrotus* (Aizoaceae) in coastal California. *Ecology* **79**: 1053–1060.
- Vilà M, Weber E, D'Antonio CM. 2000.** Conservation implications of invasion by plant hybridization. *Biological Invasions* **2**: 207–217.
- Vogt Andersen U. 1995.** Comparison of dispersal strategies of alien and native species in the Danish flora. In: Pyšek P, Prach K, Rejmánek M, Wade M, eds. *Plant invasions – general aspects and special problems*. Amsterdam: SPB Academic Publishing, 61–70.
- Wcisło H. 1977.** Chromosome numbers in the genus *Polygonum* L. s.l. in Poland. *Acta Biologica Cracoviensia Series Botanica* **20**: 153–165.
- Yonekura K, Ohashi H. 1997.** New combinations of East Asian species of *Polygonium* s.l. *Journal of Japanese Botany* **72**: 154–161.
